# Supplementary material
Source: MDPI journal article supplement (https://www.mdpi.com/2073-8994/15/7/1428)
Supplement: s1 [file s1]

Table S1: Average estimates (1st column), RMSEs (2nd column) and MRABs (3rd column) of  $\delta$ .

| $T$                 | $n[\text{FP}\%]$ | Scheme | ML<br>MPS |        |        | BLF<br>BSF |        |        |        |        |        |
|---------------------|------------------|--------|-----------|--------|--------|------------|--------|--------|--------|--------|--------|
| Prior $\rightarrow$ |                  |        |           |        |        | P1         |        |        | P2     |        |        |
| 2                   | 40[50%]          | 1      | 0.6772    | 0.1965 | 0.3566 | 0.6619     | 0.1772 | 0.3248 | 0.6227 | 0.1439 | 0.2435 |
|                     |                  |        | 0.7561    | 0.2775 | 0.5123 | 0.7397     | 0.2543 | 0.4794 | 0.4337 | 0.1398 | 0.2300 |
|                     |                  | 2      | 0.6928    | 0.2103 | 0.3874 | 0.6749     | 0.1888 | 0.3506 | 0.5911 | 0.1581 | 0.2511 |
|                     |                  |        | 0.8026    | 0.3182 | 0.6063 | 0.6888     | 0.2099 | 0.3778 | 0.6146 | 0.1532 | 0.2408 |
|                     |                  | 3      | 0.7112    | 0.2264 | 0.4230 | 0.6979     | 0.2098 | 0.3960 | 0.6391 | 0.1819 | 0.2827 |
|                     |                  |        | 0.8286    | 0.3437 | 0.6572 | 0.7458     | 0.2693 | 0.4941 | 0.6634 | 0.1912 | 0.3326 |
|                     | 40[80%]          | 1      | 0.5891    | 0.1316 | 0.2126 | 0.4362     | 0.1186 | 0.2010 | 0.5853 | 0.1105 | 0.1990 |
|                     |                  |        | 0.6216    | 0.1547 | 0.2667 | 0.4543     | 0.1145 | 0.1811 | 0.5382 | 0.1042 | 0.1636 |
|                     |                  | 2      | 0.6050    | 0.1422 | 0.2358 | 0.4279     | 0.1388 | 0.2221 | 0.5758 | 0.1315 | 0.2007 |
|                     |                  |        | 0.6199    | 0.1551 | 0.2964 | 0.5612     | 0.1202 | 0.1859 | 0.4226 | 0.1115 | 0.1852 |
|                     |                  | 3      | 0.5484    | 0.1550 | 0.3074 | 0.6482     | 0.1666 | 0.2703 | 0.6241 | 0.1421 | 0.2516 |
|                     |                  |        | 0.6753    | 0.2038 | 0.3596 | 0.6092     | 0.1565 | 0.2535 | 0.5882 | 0.1336 | 0.2027 |
|                     | 80[50%]          | 1      | 0.4681    | 0.1034 | 0.1424 | 0.4574     | 0.0911 | 0.1732 | 0.5313 | 0.0742 | 0.1498 |
|                     |                  |        | 0.5473    | 0.1032 | 0.1589 | 0.4924     | 0.0843 | 0.1388 | 0.4794 | 0.0832 | 0.1314 |
|                     |                  | 2      | 0.5616    | 0.1179 | 0.1662 | 0.4567     | 0.1092 | 0.1857 | 0.5099 | 0.1026 | 0.1811 |
|                     |                  |        | 0.4275    | 0.1061 | 0.1839 | 0.4605     | 0.0995 | 0.1605 | 0.5000 | 0.0923 | 0.1530 |
|                     |                  | 3      | 0.5121    | 0.1268 | 0.2068 | 0.5533     | 0.1182 | 0.1838 | 0.4536 | 0.1150 | 0.1959 |
|                     |                  |        | 0.4232    | 0.1175 | 0.1953 | 0.5833     | 0.1135 | 0.1867 | 0.4621 | 0.1068 | 0.1721 |
|                     | 80[80%]          | 1      | 0.5574    | 0.0712 | 0.1241 | 0.4857     | 0.0691 | 0.1114 | 0.5043 | 0.0686 | 0.1067 |
|                     |                  |        | 0.5149    | 0.0825 | 0.1328 | 0.5317     | 0.0801 | 0.1287 | 0.4784 | 0.0661 | 0.1061 |
|                     |                  | 2      | 0.5219    | 0.0828 | 0.1357 | 0.4882     | 0.0823 | 0.1338 | 0.4580 | 0.0807 | 0.1245 |
|                     |                  |        | 0.4507    | 0.0836 | 0.1415 | 0.5271     | 0.0761 | 0.1257 | 0.5552 | 0.0734 | 0.1159 |
|                     |                  | 3      | 0.5416    | 0.1118 | 0.1849 | 0.5669     | 0.1027 | 0.1664 | 0.5481 | 0.0929 | 0.1443 |
|                     |                  |        | 0.4793    | 0.0957 | 0.1569 | 0.5243     | 0.0810 | 0.1280 | 0.4715 | 0.0779 | 0.1243 |
| 5                   | 40[50%]          | 1      | 0.2082    | 0.4021 | 0.7004 | 0.4860     | 0.1155 | 0.1940 | 0.4462 | 0.1079 | 0.1817 |
|                     |                  |        | 0.1772    | 0.3981 | 0.6844 | 0.4570     | 0.1032 | 0.1721 | 0.5461 | 0.1015 | 0.1660 |
|                     |                  | 2      | 0.0729    | 0.4662 | 0.8878 | 0.6330     | 0.1751 | 0.3151 | 0.6291 | 0.1681 | 0.2758 |
|                     |                  |        | 0.0476    | 0.4755 | 0.9143 | 0.3856     | 0.1352 | 0.2390 | 0.5127 | 0.1156 | 0.1707 |
|                     |                  | 3      | 0.0354    | 0.4845 | 0.9488 | 0.6855     | 0.2126 | 0.3750 | 0.6754 | 0.2097 | 0.3568 |
|                     |                  |        | 0.0311    | 0.4839 | 0.9450 | 0.2767     | 0.2283 | 0.4466 | 0.3095 | 0.1957 | 0.3811 |
|                     | 40[80%]          | 1      | 0.2886    | 0.3412 | 0.5239 | 0.4604     | 0.0991 | 0.1657 | 0.4895 | 0.0930 | 0.1518 |
|                     |                  |        | 0.2676    | 0.3386 | 0.5133 | 0.4310     | 0.0977 | 0.1663 | 0.5035 | 0.0849 | 0.1364 |
|                     |                  | 2      | 0.2100    | 0.3927 | 0.6585 | 0.3799     | 0.1289 | 0.2420 | 0.4780 | 0.1170 | 0.1954 |
|                     |                  |        | 0.1932    | 0.3904 | 0.6460 | 0.4034     | 0.1129 | 0.2032 | 0.4377 | 0.0992 | 0.1629 |
|                     |                  | 3      | 0.0518    | 0.4758 | 0.9167 | 0.3349     | 0.1815 | 0.3315 | 0.3466 | 0.1649 | 0.3080 |
|                     |                  |        | 0.0773    | 0.4675 | 0.8925 | 0.3353     | 0.1700 | 0.3293 | 0.3825 | 0.1304 | 0.2360 |
|                     | 80[50%]          | 1      | 0.3777    | 0.1332 | 0.2258 | 0.5326     | 0.0780 | 0.1271 | 0.5090 | 0.0735 | 0.1135 |
|                     |                  |        | 0.3679    | 0.1419 | 0.2480 | 0.5189     | 0.0768 | 0.1225 | 0.4977 | 0.0741 | 0.1130 |
|                     |                  | 2      | 0.5236    | 0.1411 | 0.2452 | 0.5114     | 0.0811 | 0.1465 | 0.5202 | 0.0739 | 0.1203 |
|                     |                  |        | 0.3609    | 0.1577 | 0.2646 | 0.4770     | 0.0878 | 0.1494 | 0.5085 | 0.0830 | 0.1332 |
|                     |                  | 3      | 0.3745    | 0.1458 | 0.2783 | 0.3661     | 0.1422 | 0.2573 | 0.5316 | 0.0899 | 0.1441 |
|                     |                  |        | 0.5729    | 0.1584 | 0.2825 | 0.4369     | 0.0957 | 0.1633 | 0.4750 | 0.0892 | 0.1455 |
|                     | 80[80%]          | 1      | 0.4522    | 0.0760 | 0.1235 | 0.5142     | 0.0706 | 0.1090 | 0.5095 | 0.0554 | 0.0894 |
|                     |                  |        | 0.4424    | 0.0819 | 0.1354 | 0.4706     | 0.0693 | 0.1131 | 0.4946 | 0.0622 | 0.0979 |
|                     |                  | 2      | 0.4501    | 0.0965 | 0.1578 | 0.4633     | 0.0723 | 0.1151 | 0.5077 | 0.0594 | 0.0964 |
|                     |                  |        | 0.4654    | 0.1151 | 0.1710 | 0.4497     | 0.0785 | 0.1307 | 0.4889 | 0.0684 | 0.1081 |
|                     |                  | 3      | 0.5354    | 0.1316 | 0.2050 | 0.5070     | 0.0797 | 0.1233 | 0.4597 | 0.0628 | 0.1048 |
|                     |                  |        | 0.4345    | 0.1516 | 0.2135 | 0.4446     | 0.0865 | 0.1480 | 0.4490 | 0.0742 | 0.1215 |

Table S2: Average estimates (1st column), RMSEs (2nd column) and MRABs (3rd column) of  $\theta$ .

| $T$                 | $n[\text{FP}\%]$ | Scheme | ML<br>MPS |        |        | BLF<br>BSF |        |        |        |        |        |
|---------------------|------------------|--------|-----------|--------|--------|------------|--------|--------|--------|--------|--------|
| Prior $\rightarrow$ |                  |        |           |        |        | P1         |        |        | P2     |        |        |
| 2                   | 40[50%]          | 1      | 0.8670    | 0.6713 | 0.4220 | 0.8405     | 0.6628 | 0.3967 | 1.2177 | 0.4271 | 0.2270 |
|                     |                  |        | 0.8618    | 0.6407 | 0.4254 | 0.7955     | 0.5943 | 0.3680 | 1.0036 | 0.5079 | 0.3309 |
|                     |                  | 2      | 0.6565    | 0.8462 | 0.5624 | 0.7993     | 0.7036 | 0.4671 | 0.9669 | 0.6021 | 0.3576 |
|                     |                  |        | 0.6698    | 0.8320 | 0.5535 | 0.8826     | 0.7199 | 0.4379 | 0.9004 | 0.6077 | 0.3997 |
|                     |                  | 3      | 0.5283    | 0.9734 | 0.6478 | 0.6487     | 0.8535 | 0.5275 | 0.6851 | 0.8191 | 0.4822 |
|                     |                  |        | 0.5383    | 0.9642 | 0.6412 | 0.6553     | 0.8966 | 0.5649 | 0.6094 | 0.8725 | 0.5376 |
|                     | 40[80%]          | 1      | 1.8476    | 0.3913 | 0.2347 | 1.3485     | 0.3764 | 0.1944 | 1.6531 | 0.2633 | 0.1415 |
|                     |                  |        | 1.1572    | 0.3526 | 0.2286 | 1.6489     | 0.3115 | 0.1770 | 1.6360 | 0.2043 | 0.1062 |
|                     |                  | 2      | 0.9727    | 0.5829 | 0.3531 | 1.9080     | 0.4945 | 0.2803 | 1.1349 | 0.4044 | 0.2444 |
|                     |                  |        | 1.2292    | 0.4407 | 0.2483 | 1.1275     | 0.3816 | 0.2258 | 1.1767 | 0.3477 | 0.2156 |
|                     |                  | 3      | 0.8779    | 0.7032 | 0.4358 | 0.8205     | 0.6820 | 0.4530 | 0.9568 | 0.5524 | 0.3622 |
|                     |                  |        | 0.9977    | 0.5673 | 0.3387 | 0.9919     | 0.5319 | 0.3374 | 1.9088 | 0.4464 | 0.2725 |
|                     | 80[50%]          | 1      | 1.3229    | 0.3658 | 0.1870 | 1.3532     | 0.2023 | 0.1071 | 1.3820 | 0.1799 | 0.0960 |
|                     |                  |        | 1.6691    | 0.2867 | 0.1490 | 1.6467     | 0.2417 | 0.1243 | 1.3653 | 0.1899 | 0.1051 |
|                     |                  | 2      | 1.1051    | 0.4989 | 0.2761 | 1.6138     | 0.2127 | 0.1824 | 1.3829 | 0.1804 | 0.0945 |
|                     |                  |        | 1.7182    | 0.3533 | 0.1829 | 1.2443     | 0.2840 | 0.1731 | 1.3592 | 0.1907 | 0.1054 |
|                     |                  | 3      | 0.8509    | 0.6239 | 0.3272 | 0.9882     | 0.5259 | 0.3412 | 0.9675 | 0.4724 | 0.3116 |
|                     |                  |        | 1.0846    | 0.5529 | 0.3061 | 1.2123     | 0.3027 | 0.1919 | 1.2432 | 0.2856 | 0.1737 |
|                     | 80[80%]          | 1      | 1.3755    | 0.3195 | 0.1588 | 1.5339     | 0.1294 | 0.0705 | 1.5554 | 0.1155 | 0.0665 |
|                     |                  |        | 1.6462    | 0.2371 | 0.1211 | 1.4327     | 0.1419 | 0.0798 | 1.5406 | 0.1261 | 0.0705 |
|                     |                  | 2      | 1.4235    | 0.3321 | 0.1785 | 1.5624     | 0.1332 | 0.0795 | 1.5236 | 0.1285 | 0.0709 |
|                     |                  |        | 1.6324    | 0.2404 | 0.1219 | 1.4216     | 0.1482 | 0.0814 | 1.5517 | 0.1285 | 0.0713 |
|                     |                  | 3      | 1.0959    | 0.4402 | 0.2695 | 1.4259     | 0.3518 | 0.1818 | 1.3576 | 0.3021 | 0.1070 |
|                     |                  |        | 1.2302    | 0.2862 | 0.1799 | 1.6632     | 0.2672 | 0.1364 | 1.4849 | 0.1654 | 0.0879 |
| 5                   | 40[50%]          | 1      | 0.2011    | 1.3975 | 0.8839 | 1.3030     | 0.2463 | 0.1432 | 1.2889 | 0.2432 | 0.1349 |
|                     |                  |        | 0.6334    | 1.1861 | 0.6651 | 1.7820     | 0.3160 | 0.1882 | 1.3026 | 0.2498 | 0.1468 |
|                     |                  | 2      | 0.1397    | 1.4266 | 0.9137 | 1.5859     | 0.2889 | 0.1563 | 1.2897 | 0.2495 | 0.1422 |
|                     |                  |        | 0.1565    | 1.4258 | 0.9113 | 1.8469     | 0.3699 | 0.2312 | 1.7328 | 0.2598 | 0.1553 |
|                     |                  | 3      | 0.0947    | 1.4512 | 0.9428 | 1.0991     | 0.4126 | 0.1940 | 1.1173 | 0.4011 | 0.2552 |
|                     |                  |        | 0.1061    | 1.4505 | 0.9405 | 1.8542     | 0.3820 | 0.2362 | 1.8150 | 0.3556 | 0.2123 |
|                     | 40[80%]          | 1      | 0.8161    | 1.0084 | 0.4903 | 1.6600     | 0.2073 | 0.1217 | 1.5671 | 0.1871 | 0.1027 |
|                     |                  |        | 0.8682    | 1.0067 | 0.4878 | 1.6950     | 0.2345 | 0.1338 | 1.3440 | 0.2233 | 0.1318 |
|                     |                  | 2      | 0.5779    | 1.1702 | 0.6380 | 1.6664     | 0.2142 | 0.1258 | 1.6781 | 0.2079 | 0.1208 |
|                     |                  |        | 0.6243    | 1.1676 | 0.6324 | 1.6915     | 0.2519 | 0.1360 | 1.3554 | 0.2359 | 0.1250 |
|                     |                  | 3      | 0.5528    | 1.1891 | 0.6696 | 1.3319     | 0.2313 | 0.1298 | 1.6931 | 0.2204 | 0.1240 |
|                     |                  |        | 0.1839    | 1.3987 | 0.8865 | 1.7434     | 0.2836 | 0.1668 | 1.7214 | 0.2511 | 0.1482 |
|                     | 80[50%]          | 1      | 1.4369    | 0.1914 | 0.1039 | 1.4130     | 0.1594 | 0.0843 | 1.5908 | 0.1427 | 0.0784 |
|                     |                  |        | 1.6423    | 0.2434 | 0.1268 | 1.5450     | 0.1708 | 0.0875 | 1.5560 | 0.1355 | 0.0676 |
|                     |                  | 2      | 1.5415    | 0.2917 | 0.1488 | 1.4739     | 0.1877 | 0.1039 | 1.4734 | 0.1753 | 0.0983 |
|                     |                  |        | 1.6038    | 0.3216 | 0.1614 | 1.6034     | 0.1742 | 0.0932 | 1.5379 | 0.1490 | 0.0815 |
|                     |                  | 3      | 1.4750    | 0.3122 | 0.1596 | 1.5857     | 0.2160 | 0.1159 | 1.5527 | 0.1849 | 0.1005 |
|                     |                  |        | 1.3443    | 0.3252 | 0.1660 | 1.5957     | 0.1879 | 0.0972 | 1.6105 | 0.1635 | 0.0914 |
|                     | 80[80%]          | 1      | 1.4099    | 0.1534 | 0.0853 | 1.4398     | 0.1352 | 0.0728 | 1.4641 | 0.1122 | 0.0570 |
|                     |                  |        | 1.4333    | 0.1419 | 0.0782 | 1.4899     | 0.1308 | 0.0696 | 1.5349 | 0.1221 | 0.0646 |
|                     |                  | 2      | 1.4835    | 0.1883 | 0.0977 | 1.3815     | 0.1642 | 0.0896 | 1.3882 | 0.1498 | 0.0825 |
|                     |                  |        | 1.4770    | 0.1884 | 0.0991 | 1.4244     | 0.1460 | 0.0796 | 1.4844 | 0.1393 | 0.0766 |
|                     |                  | 3      | 1.4404    | 0.2769 | 0.1391 | 1.3861     | 0.1757 | 0.0932 | 1.5644 | 0.1537 | 0.0839 |
|                     |                  |        | 1.5240    | 0.1937 | 0.1010 | 1.6094     | 0.1587 | 0.0837 | 1.4412 | 0.1520 | 0.0843 |

Table S3: Average estimates (1st column), RMSEs (2nd column) and MRABs (3rd column) of  $R(t)$ .

| $T$                 | $n[\text{FP}\%]$ | Scheme | ML<br>MPS |        |        | BLF<br>BSF |        |        |        |        |        |
|---------------------|------------------|--------|-----------|--------|--------|------------|--------|--------|--------|--------|--------|
| Prior $\rightarrow$ |                  |        |           |        |        | P1         |        |        | P2     |        |        |
| 2                   | 40[50%]          | 1      | 0.9199    | 0.1291 | 0.1197 | 0.9291     | 0.0594 | 0.0572 | 0.9509 | 0.0405 | 0.0419 |
|                     |                  |        | 0.9486    | 0.0589 | 0.0682 | 0.9383     | 0.0514 | 0.0478 | 0.9567 | 0.0440 | 0.0310 |
|                     |                  |        | 0.9217    | 0.1455 | 0.1222 | 0.9283     | 0.0598 | 0.0579 | 0.9340 | 0.0536 | 0.0502 |
|                     |                  | 3      | 0.9097    | 0.0791 | 0.0768 | 0.9314     | 0.0642 | 0.0548 | 0.9291 | 0.0604 | 0.0472 |
|                     |                  |        | 0.9229    | 0.1604 | 0.1739 | 0.9086     | 0.0641 | 0.0622 | 0.9329 | 0.0544 | 0.0533 |
|                     |                  |        | 0.8807    | 0.1083 | 0.1063 | 0.8988     | 0.0915 | 0.0879 | 0.9285 | 0.0732 | 0.0579 |
|                     | 40[80%]          | 1      | 0.9113    | 0.1232 | 0.0978 | 0.9922     | 0.0423 | 0.0420 | 0.9880 | 0.0381 | 0.0321 |
|                     |                  |        | 0.9644    | 0.0374 | 0.0313 | 0.9650     | 0.0259 | 0.0213 | 0.9780 | 0.0213 | 0.0183 |
|                     |                  |        | 0.9156    | 0.1360 | 0.1187 | 0.9465     | 0.0438 | 0.0437 | 0.9340 | 0.0416 | 0.0399 |
|                     |                  | 3      | 0.9499    | 0.0510 | 0.0391 | 0.9526     | 0.0352 | 0.0333 | 0.9615 | 0.0316 | 0.0242 |
|                     |                  |        | 0.9168    | 0.1473 | 0.1362 | 0.9161     | 0.0527 | 0.0573 | 0.9329 | 0.0504 | 0.0509 |
|                     |                  |        | 0.9475    | 0.0521 | 0.0448 | 0.9412     | 0.0471 | 0.0409 | 0.9544 | 0.0345 | 0.0314 |
|                     | 80[50%]          | 1      | 0.9143    | 0.0955 | 0.0792 | 0.9875     | 0.0363 | 0.0383 | 0.9744 | 0.0284 | 0.0289 |
|                     |                  |        | 0.9880    | 0.0268 | 0.0233 | 0.9807     | 0.0187 | 0.0167 | 0.9935 | 0.0160 | 0.0139 |
|                     |                  |        | 0.9129    | 0.1029 | 0.0834 | 0.9877     | 0.0391 | 0.0395 | 0.9749 | 0.0317 | 0.0356 |
|                     |                  | 3      | 0.9879    | 0.0298 | 0.0319 | 0.9675     | 0.0217 | 0.0216 | 0.9798 | 0.0179 | 0.0161 |
|                     |                  |        | 0.9179    | 0.1195 | 0.1068 | 0.9722     | 0.0411 | 0.0420 | 0.9747 | 0.0343 | 0.0374 |
|                     |                  |        | 0.9884    | 0.0388 | 0.0389 | 0.9674     | 0.0285 | 0.0287 | 0.9774 | 0.0233 | 0.0196 |
|                     | 80[80%]          | 1      | 0.9159    | 0.0766 | 0.0695 | 0.9874     | 0.0329 | 0.0329 | 0.9744 | 0.0235 | 0.0238 |
|                     |                  |        | 0.9892    | 0.0170 | 0.0185 | 0.9875     | 0.0135 | 0.0130 | 0.9929 | 0.0117 | 0.0133 |
|                     |                  |        | 0.9129    | 0.0834 | 0.0754 | 0.9894     | 0.0342 | 0.0347 | 0.9749 | 0.0247 | 0.0280 |
|                     |                  | 3      | 0.9886    | 0.0218 | 0.0238 | 0.9846     | 0.0178 | 0.0163 | 0.9925 | 0.0141 | 0.0146 |
|                     |                  |        | 0.9126    | 0.0862 | 0.0839 | 0.9874     | 0.0352 | 0.0365 | 0.9747 | 0.0270 | 0.0309 |
|                     |                  |        | 0.9863    | 0.0297 | 0.0288 | 0.9819     | 0.0218 | 0.0219 | 0.9925 | 0.0179 | 0.0180 |
| 5                   | 40[50%]          | 1      | 0.9248    | 0.0940 | 0.0872 | 0.9796     | 0.0432 | 0.0388 | 0.9775 | 0.0340 | 0.0310 |
|                     |                  |        | 0.1341    | 0.0494 | 0.0564 | 0.9964     | 0.0412 | 0.0362 | 0.9858 | 0.0371 | 0.0272 |
|                     |                  |        | 0.9236    | 0.1060 | 0.0893 | 0.9687     | 0.0516 | 0.0472 | 0.9680 | 0.0430 | 0.0416 |
|                     |                  | 3      | 0.0967    | 0.0588 | 0.0678 | 0.9782     | 0.0495 | 0.0390 | 0.9934 | 0.0426 | 0.0332 |
|                     |                  |        | 0.9056    | 0.1168 | 0.0928 | 0.9533     | 0.0629 | 0.0606 | 0.9546 | 0.0523 | 0.0480 |
|                     |                  |        | 0.0652    | 0.0952 | 0.0876 | 0.9787     | 0.0622 | 0.0686 | 0.9950 | 0.0498 | 0.0447 |
|                     | 40[80%]          | 1      | 0.9181    | 0.0897 | 0.0713 | 0.9833     | 0.0374 | 0.0351 | 0.9871 | 0.0303 | 0.0282 |
|                     |                  |        | 0.5476    | 0.0368 | 0.0289 | 0.9837     | 0.0231 | 0.0199 | 0.9860 | 0.0205 | 0.0175 |
|                     |                  |        | 0.9173    | 0.0945 | 0.0792 | 0.9806     | 0.0385 | 0.0373 | 0.9919 | 0.0328 | 0.0330 |
|                     |                  | 3      | 0.3927    | 0.0458 | 0.0339 | 0.9829     | 0.0338 | 0.0285 | 0.9890 | 0.0272 | 0.0213 |
|                     |                  |        | 0.9152    | 0.1073 | 0.0846 | 0.9835     | 0.0412 | 0.0436 | 0.9833 | 0.0387 | 0.0391 |
|                     |                  |        | 0.3804    | 0.0497 | 0.0408 | 0.9815     | 0.0392 | 0.0319 | 0.9862 | 0.0333 | 0.0279 |
|                     | 80[50%]          | 1      | 0.9705    | 0.0695 | 0.0577 | 0.9774     | 0.0341 | 0.0352 | 0.9883 | 0.0257 | 0.0250 |
|                     |                  |        | 0.9880    | 0.0188 | 0.0194 | 0.9895     | 0.0172 | 0.0160 | 0.9893 | 0.0146 | 0.0122 |
|                     |                  |        | 0.9709    | 0.0750 | 0.0608 | 0.9770     | 0.0372 | 0.0361 | 0.9811 | 0.0283 | 0.0287 |
|                     |                  | 3      | 0.9910    | 0.0227 | 0.0257 | 0.9876     | 0.0209 | 0.0189 | 0.9868 | 0.0154 | 0.0139 |
|                     |                  |        | 0.9708    | 0.0895 | 0.0668 | 0.9917     | 0.0399 | 0.0383 | 0.9796 | 0.0316 | 0.0313 |
|                     |                  |        | 0.9706    | 0.0272 | 0.0318 | 0.9871     | 0.0254 | 0.0236 | 0.9925 | 0.0218 | 0.0173 |
|                     | 80[80%]          | 1      | 0.9852    | 0.0558 | 0.0467 | 0.9866     | 0.0255 | 0.0268 | 0.9885 | 0.0218 | 0.0214 |
|                     |                  |        | 0.9860    | 0.0154 | 0.0145 | 0.9892     | 0.0128 | 0.0130 | 0.9866 | 0.0109 | 0.0114 |
|                     |                  |        | 0.9854    | 0.0608 | 0.0545 | 0.9877     | 0.0264 | 0.0301 | 0.9882 | 0.0239 | 0.0232 |
|                     |                  | 3      | 0.9907    | 0.0169 | 0.0162 | 0.9896     | 0.0155 | 0.0153 | 0.9880 | 0.0123 | 0.0129 |
|                     |                  |        | 0.9919    | 0.0628 | 0.0571 | 0.9892     | 0.0289 | 0.0331 | 0.9885 | 0.0259 | 0.0276 |
|                     |                  |        | 0.9864    | 0.0193 | 0.0196 | 0.9890     | 0.0185 | 0.0169 | 0.9900 | 0.0147 | 0.0152 |

Table S4: Average estimates (1st column), RMSEs (2nd column) and MRABs (3rd column) of  $h(t)$ .

| $T$                 | $n[\text{FP}\%]$ | Scheme | ML<br>MPS |        |        | BLF<br>BSF |        |        |        |        |        |
|---------------------|------------------|--------|-----------|--------|--------|------------|--------|--------|--------|--------|--------|
| Prior $\rightarrow$ |                  |        |           |        |        | P1         |        |        | P2     |        |        |
| 2                   | 40[50%]          | 1      | 0.2714    | 0.2006 | 1.7589 | 0.2770     | 0.1775 | 1.5494 | 0.2657 | 0.1640 | 1.4445 |
|                     |                  |        | 0.2093    | 0.1875 | 1.0382 | 0.2681     | 0.1638 | 0.9662 | 0.2301 | 0.1357 | 0.8773 |
|                     |                  |        | 0.2849    | 0.2149 | 1.9055 | 0.2905     | 0.1892 | 1.6734 | 0.2793 | 0.1765 | 1.5701 |
|                     |                  | 2      | 0.2177    | 0.2573 | 1.1231 | 0.2258     | 0.2287 | 1.0997 | 0.2693 | 0.1760 | 0.9873 |
|                     |                  |        | 0.2899    | 0.2316 | 2.0959 | 0.2952     | 0.1947 | 1.7566 | 0.2846 | 0.1820 | 1.6180 |
|                     |                  |        | 0.2590    | 0.2834 | 1.3852 | 0.2136     | 0.2407 | 1.1995 | 0.2544 | 0.2282 | 1.1164 |
|                     | 40[80%]          | 1      | 0.1887    | 0.1382 | 0.7152 | 0.1646     | 0.0824 | 0.5803 | 0.1509 | 0.0723 | 0.5271 |
|                     |                  |        | 0.1856    | 0.1336 | 0.8222 | 0.1945     | 0.1043 | 0.6636 | 0.1468 | 0.0645 | 0.4461 |
|                     |                  |        | 0.2070    | 0.1661 | 0.9846 | 0.2044     | 0.1039 | 0.8088 | 0.1963 | 0.0945 | 0.7824 |
|                     |                  | 2      | 0.1607    | 0.1368 | 0.9435 | 0.2110     | 0.1197 | 0.8388 | 0.1834 | 0.0844 | 0.6940 |
|                     |                  |        | 0.1844    | 0.1892 | 1.4021 | 0.1793     | 0.1718 | 1.2657 | 0.2296 | 0.1418 | 1.1209 |
|                     |                  |        | 0.1538    | 0.1680 | 1.2720 | 0.2687     | 0.1414 | 0.9609 | 0.2072 | 0.1186 | 0.9104 |
|                     | 80[50%]          | 1      | 0.1078    | 0.0965 | 0.6100 | 0.1066     | 0.0589 | 0.4549 | 0.0903 | 0.0511 | 0.4132 |
|                     |                  |        | 0.1878    | 0.0543 | 0.4168 | 0.1320     | 0.0493 | 0.3702 | 0.1123 | 0.0425 | 0.3075 |
|                     |                  |        | 0.1280    | 0.1175 | 0.6989 | 0.1383     | 0.0757 | 0.5752 | 0.1306 | 0.0625 | 0.4442 |
|                     |                  | 2      | 0.1611    | 0.0766 | 0.5686 | 0.1495     | 0.0630 | 0.4902 | 0.1059 | 0.0570 | 0.4489 |
|                     |                  |        | 0.1461    | 0.1541 | 1.0462 | 0.2461     | 0.1396 | 0.8824 | 0.1610 | 0.0835 | 0.5580 |
|                     |                  |        | 0.1952    | 0.1141 | 0.8251 | 0.1686     | 0.1003 | 0.6638 | 0.1430 | 0.0639 | 0.4774 |
|                     | 80[80%]          | 1      | 0.1055    | 0.0723 | 0.3188 | 0.1099     | 0.0385 | 0.2513 | 0.1011 | 0.0331 | 0.2392 |
|                     |                  |        | 0.1092    | 0.0426 | 0.3484 | 0.1082     | 0.0403 | 0.3047 | 0.1100 | 0.0323 | 0.2402 |
|                     |                  |        | 0.1144    | 0.0813 | 0.4851 | 0.1063     | 0.0427 | 0.3948 | 0.0922 | 0.0396 | 0.3005 |
|                     |                  | 2      | 0.1093    | 0.0516 | 0.4101 | 0.1097     | 0.0447 | 0.3248 | 0.1090 | 0.0364 | 0.2864 |
|                     |                  |        | 0.1797    | 0.1195 | 0.5943 | 0.1081     | 0.0641 | 0.4506 | 0.0710 | 0.0488 | 0.3909 |
|                     |                  |        | 0.1088    | 0.0801 | 0.4993 | 0.1081     | 0.0651 | 0.3702 | 0.1077 | 0.0472 | 0.3403 |
| 5                   | 40[50%]          | 1      | 0.2416    | 0.1008 | 0.5668 | 0.2791     | 0.0833 | 0.4801 | 0.2421 | 0.0566 | 0.3606 |
|                     |                  |        | 0.1606    | 0.1057 | 0.5243 | 0.1345     | 0.0542 | 0.4413 | 0.0632 | 0.0523 | 0.4013 |
|                     |                  |        | 0.2621    | 0.1304 | 0.5946 | 0.2958     | 0.1072 | 0.5037 | 0.1380 | 0.0796 | 0.4432 |
|                     |                  | 2      | 0.0224    | 0.1092 | 0.5512 | 0.1353     | 0.0598 | 0.4872 | 0.0566 | 0.0575 | 0.4506 |
|                     |                  |        | 0.2218    | 0.1932 | 0.6431 | 0.2629     | 0.1257 | 0.5447 | 0.1960 | 0.0892 | 0.4851 |
|                     |                  |        | 0.1678    | 0.1165 | 0.7669 | 0.0309     | 0.0790 | 0.7162 | 0.0413 | 0.0689 | 0.6198 |
|                     | 40[80%]          | 1      | 0.2212    | 0.1116 | 0.3694 | 0.2155     | 0.0619 | 0.3027 | 0.0989 | 0.0490 | 0.2375 |
|                     |                  |        | 0.0400    | 0.0870 | 0.4702 | 0.0674     | 0.0474 | 0.3983 | 0.0835 | 0.0414 | 0.3078 |
|                     |                  |        | 0.2314    | 0.1182 | 0.3786 | 0.2217     | 0.0833 | 0.3197 | 0.0947 | 0.0688 | 0.2755 |
|                     |                  | 2      | 0.0347    | 0.0911 | 0.4966 | 0.0629     | 0.0518 | 0.4411 | 0.1267 | 0.0436 | 0.3227 |
|                     |                  |        | 0.2238    | 0.1266 | 0.3928 | 0.2297     | 0.0967 | 0.3447 | 0.1141 | 0.0735 | 0.2995 |
|                     |                  |        | 0.1597    | 0.1039 | 0.5288 | 0.0551     | 0.0565 | 0.4933 | 0.1258 | 0.0491 | 0.3647 |
|                     | 80[50%]          | 1      | 0.2147    | 0.0935 | 0.2735 | 0.1754     | 0.0512 | 0.2016 | 0.1307 | 0.0408 | 0.1876 |
|                     |                  |        | 0.0914    | 0.0492 | 0.3752 | 0.0835     | 0.0387 | 0.3128 | 0.0952 | 0.0378 | 0.3033 |
|                     |                  |        | 0.2096    | 0.1001 | 0.2905 | 0.1712     | 0.0696 | 0.2460 | 0.1364 | 0.0484 | 0.2156 |
|                     |                  | 2      | 0.0633    | 0.0567 | 0.4602 | 0.0887     | 0.0422 | 0.3376 | 0.0817 | 0.0400 | 0.3093 |
|                     |                  |        | 0.2238    | 0.1108 | 0.2935 | 0.1828     | 0.0797 | 0.2756 | 0.0976 | 0.0593 | 0.2478 |
|                     |                  |        | 0.0557    | 0.0778 | 0.4977 | 0.1001     | 0.0437 | 0.3374 | 0.1169 | 0.0416 | 0.3172 |
|                     | 80[80%]          | 1      | 0.2031    | 0.0573 | 0.2701 | 0.1659     | 0.0326 | 0.1878 | 0.0954 | 0.0281 | 0.1674 |
|                     |                  |        | 0.0880    | 0.0332 | 0.2761 | 0.0977     | 0.0326 | 0.2450 | 0.0968 | 0.0315 | 0.2397 |
|                     |                  |        | 0.1992    | 0.0714 | 0.2598 | 0.1627     | 0.0364 | 0.2189 | 0.0965 | 0.0294 | 0.1830 |
|                     |                  | 2      | 0.0933    | 0.0443 | 0.3405 | 0.1055     | 0.0342 | 0.2648 | 0.0843 | 0.0328 | 0.2416 |
|                     |                  |        | 0.2107    | 0.0896 | 0.2815 | 0.1721     | 0.0394 | 0.2384 | 0.0987 | 0.0317 | 0.2143 |
|                     |                  |        | 0.0664    | 0.0488 | 0.4010 | 0.0951     | 0.0377 | 0.3024 | 0.0877 | 0.0351 | 0.2775 |



Table S5: The ACLs (1st column) and CPs (2nd column) of asymptotic/credible intervals of  $\delta$ .

| $T$                 | $n[\text{FP}\%]$ | Scheme | ACI-LF<br>ACI-SF |       | BCI-LF<br>BCI-SF |        |        |        |
|---------------------|------------------|--------|------------------|-------|------------------|--------|--------|--------|
| Prior $\rightarrow$ |                  |        |                  |       | P1               |        | P2     |        |
| 2                   | 40[50%]          | 1      | 0.4317           | 0.932 | 0.4158           | 0.941  | 0.4021 | 0.949  |
|                     |                  |        | 0.4291           | 0.937 | 0.3870           | 0.945  | 0.3683 | 0.952  |
|                     |                  | 2      | 0.4412           | 0.929 | 0.4236           | 0.939  | 0.4159 | 0.945  |
|                     |                  |        | 0.4317           | 0.932 | 0.4159           | 0.941  | 0.3937 | 0.948  |
|                     |                  | 3      | 0.5038           | 0.922 | 0.4456           | 0.937  | 0.4309 | 0.942  |
|                     |                  |        | 0.4853           | 0.924 | 0.4302           | 0.938  | 0.4090 | 0.946  |
|                     | 40[80%]          | 1      | 0.4206           | 0.940 | 0.3594           | 0.948  | 0.3461 | 0.953  |
|                     |                  |        | 0.4021           | 0.943 | 0.3579           | 0.948  | 0.3055 | 0.955  |
|                     |                  | 2      | 0.4307           | 0.932 | 0.3702           | 0.946  | 0.3622 | 0.949  |
|                     |                  |        | 0.4046           | 0.942 | 0.3758           | 0.946  | 0.3579 | 0.951  |
|                     |                  | 3      | 0.4412           | 0.930 | 0.4090           | 0.944  | 0.3884 | 0.947  |
|                     |                  |        | 0.4128           | 0.941 | 0.3810           | 0.945  | 0.3764 | 0.949  |
|                     | 80[50%]          | 1      | 0.3142           | 0.948 | 0.2861           | 0.956  | 0.2766 | 0.959  |
|                     |                  |        | 0.3080           | 0.951 | 0.3048           | 0.952  | 0.3033 | 0.957  |
|                     |                  | 2      | 0.3193           | 0.947 | 0.2950           | 0.955  | 0.2873 | 0.958  |
|                     |                  |        | 0.3303           | 0.945 | 0.3183           | 0.953  | 0.3102 | 0.956  |
|                     |                  | 3      | 0.3657           | 0.943 | 0.3292           | 0.951  | 0.3137 | 0.955  |
|                     |                  |        | 0.3497           | 0.941 | 0.3361           | 0.950  | 0.3276 | 0.952  |
|                     | 80[80%]          | 1      | 0.2988           | 0.955 | 0.2728           | 0.959  | 0.2594 | 0.963  |
|                     |                  |        | 0.2845           | 0.957 | 0.2791           | 0.959  | 0.2696 | 0.962  |
|                     |                  | 2      | 0.3128           | 0.949 | 0.2825           | 0.958  | 0.2779 | 0.961  |
|                     |                  |        | 0.3180           | 0.948 | 0.2915           | 0.957  | 0.2838 | 0.960  |
|                     |                  | 3      | 0.3202           | 0.948 | 0.3064           | 0.954  | 0.2832 | 0.960  |
|                     |                  |        | 0.3287           | 0.947 | 0.3079           | 0.954  | 0.2969 | 0.958  |
| 5                   | 40[50%]          | 1      | 0.4206           | 0.939 | 0.3917           | 0.953  | 0.3723 | 0.964  |
|                     |                  |        | 0.4291           | 0.936 | 0.3452           | 0.950  | 0.3033 | 0.967  |
|                     |                  | 2      | 0.4336           | 0.934 | 0.4021           | 0.946  | 0.3963 | 0.962  |
|                     |                  |        | 0.4359           | 0.934 | 0.3704           | 0.948  | 0.3467 | 0.965  |
|                     |                  | 3      | 0.4974           | 0.926 | 0.4193           | 0.944  | 0.4058 | 0.960  |
|                     |                  |        | 0.4751           | 0.928 | 0.4090           | 0.942  | 0.3870 | 0.963  |
|                     | 40[80%]          | 1      | 0.3318           | 0.945 | 0.3055           | 0.959  | 0.2539 | 0.971  |
|                     |                  |        | 0.2948           | 0.956 | 0.2890           | 0.963  | 0.2533 | 0.973  |
|                     |                  | 2      | 0.3594           | 0.942 | 0.3212           | 0.956  | 0.3148 | 0.966  |
|                     |                  |        | 0.3180           | 0.949 | 0.3140           | 0.960  | 0.3091 | 0.968  |
|                     |                  | 3      | 0.4349           | 0.932 | 0.4013           | 0.951  | 0.3878 | 0.962  |
|                     |                  |        | 0.4227           | 0.937 | 0.3260           | 0.956  | 0.3142 | 0.965  |
|                     | 80[50%]          | 1      | 0.2512           | 0.957 | 0.2253           | 0.967  | 0.1479 | 0.974  |
|                     |                  |        | 0.2489           | 0.959 | 0.2188           | 0.970  | 0.1129 | 0.978  |
|                     |                  | 2      | 0.2848           | 0.953 | 0.2312           | 0.965  | 0.1653 | 0.9730 |
|                     |                  |        | 0.2667           | 0.956 | 0.2449           | 0.963  | 0.1621 | 0.973  |
|                     |                  | 3      | 0.3007           | 0.951 | 0.2760           | 0.9610 | 0.2243 | 0.9700 |
|                     |                  |        | 0.3076           | 0.950 | 0.2751           | 0.961  | 0.2232 | 0.970  |
|                     | 80[80%]          | 1      | 0.1918           | 0.963 | 0.1743           | 0.975  | 0.1125 | 0.984  |
|                     |                  |        | 0.1893           | 0.965 | 0.1655           | 0.978  | 0.1098 | 0.985  |
|                     |                  | 2      | 0.2781           | 0.957 | 0.1846           | 0.972  | 0.1262 | 0.982  |
|                     |                  |        | 0.2098           | 0.962 | 0.1819           | 0.973  | 0.1242 | 0.983  |
|                     |                  | 3      | 0.2832           | 0.956 | 0.2122           | 0.968  | 0.1691 | 0.980  |
|                     |                  |        | 0.2437           | 0.960 | 0.2226           | 0.967  | 0.1494 | 0.979  |

Table S6: The ACLs (1st column) and CPs (2nd column) of asymptotic/credible intervals of  $\theta$ .

| $T$                 | $n[\text{FP}\%]$ | Scheme | ACI-LF |       | BCI-LF |       |        |       |
|---------------------|------------------|--------|--------|-------|--------|-------|--------|-------|
|                     |                  |        | ACI-SF |       | BCI-SF |       |        |       |
| Prior $\rightarrow$ |                  |        |        |       | P1     |       | P2     |       |
| 2                   | 40[50%]          | 1      | 0.6741 | 0.924 | 0.6413 | 0.938 | 0.6072 | 0.947 |
|                     |                  |        | 0.6573 | 0.927 | 0.5990 | 0.941 | 0.4857 | 0.952 |
|                     |                  | 2      | 0.8026 | 0.918 | 0.7230 | 0.928 | 0.6467 | 0.936 |
|                     |                  |        | 0.8647 | 0.914 | 0.6518 | 0.932 | 0.5598 | 0.942 |
|                     |                  | 3      | 0.8536 | 0.915 | 0.7737 | 0.924 | 0.6787 | 0.933 |
|                     |                  |        | 0.9395 | 0.910 | 0.7407 | 0.929 | 0.6221 | 0.938 |
|                     | 40[80%]          | 1      | 0.4685 | 0.935 | 0.4385 | 0.949 | 0.4199 | 0.953 |
|                     |                  |        | 0.4532 | 0.937 | 0.4326 | 0.950 | 0.3486 | 0.958 |
|                     |                  | 2      | 0.5588 | 0.932 | 0.5288 | 0.941 | 0.5036 | 0.950 |
|                     |                  |        | 0.6066 | 0.927 | 0.4968 | 0.944 | 0.4599 | 0.955 |
|                     |                  | 3      | 0.6814 | 0.922 | 0.6499 | 0.937 | 0.5371 | 0.945 |
|                     |                  |        | 0.6736 | 0.924 | 0.5592 | 0.934 | 0.4855 | 0.949 |
|                     | 80[50%]          | 1      | 0.3861 | 0.941 | 0.2735 | 0.958 | 0.2164 | 0.966 |
|                     |                  |        | 0.3348 | 0.944 | 0.3275 | 0.955 | 0.2209 | 0.963 |
|                     |                  | 2      | 0.5896 | 0.932 | 0.4910 | 0.946 | 0.4020 | 0.957 |
|                     |                  |        | 0.4857 | 0.936 | 0.4592 | 0.950 | 0.4359 | 0.952 |
|                     |                  | 3      | 0.6248 | 0.928 | 0.4951 | 0.942 | 0.4898 | 0.950 |
|                     |                  |        | 0.6178 | 0.930 | 0.4882 | 0.944 | 0.4530 | 0.953 |
|                     | 80[80%]          | 1      | 0.3076 | 0.948 | 0.2379 | 0.962 | 0.2051 | 0.972 |
|                     |                  |        | 0.2886 | 0.951 | 0.2280 | 0.965 | 0.1857 | 0.975 |
|                     |                  | 2      | 0.3980 | 0.942 | 0.3138 | 0.956 | 0.2371 | 0.965 |
|                     |                  |        | 0.3622 | 0.945 | 0.2527 | 0.959 | 0.2304 | 0.969 |
|                     |                  | 3      | 0.4381 | 0.939 | 0.3676 | 0.950 | 0.2534 | 0.963 |
|                     |                  |        | 0.3983 | 0.936 | 0.3435 | 0.953 | 0.2413 | 0.964 |
| 5                   | 40[50%]          | 1      | 0.7230 | 0.921 | 0.7119 | 0.935 | 0.6303 | 0.940 |
|                     |                  |        | 0.7140 | 0.922 | 0.6132 | 0.938 | 0.5219 | 0.945 |
|                     |                  | 2      | 0.8536 | 0.915 | 0.7645 | 0.931 | 0.6771 | 0.938 |
|                     |                  |        | 0.7426 | 0.919 | 0.6956 | 0.935 | 0.5673 | 0.942 |
|                     |                  | 3      | 0.9983 | 0.910 | 0.9389 | 0.925 | 0.6787 | 0.933 |
|                     |                  |        | 0.9488 | 0.908 | 0.7737 | 0.929 | 0.6538 | 0.931 |
|                     | 40[80%]          | 1      | 0.5267 | 0.931 | 0.5432 | 0.945 | 0.4612 | 0.954 |
|                     |                  |        | 0.4846 | 0.934 | 0.4581 | 0.951 | 0.3934 | 0.957 |
|                     |                  | 2      | 0.6397 | 0.926 | 0.5847 | 0.939 | 0.5418 | 0.949 |
|                     |                  |        | 0.5977 | 0.929 | 0.5566 | 0.946 | 0.4665 | 0.952 |
|                     |                  | 3      | 0.7544 | 0.919 | 0.6928 | 0.933 | 0.6221 | 0.941 |
|                     |                  |        | 0.7540 | 0.920 | 0.6184 | 0.941 | 0.5024 | 0.945 |
|                     | 80[50%]          | 1      | 0.4983 | 0.938 | 0.4528 | 0.950 | 0.4392 | 0.958 |
|                     |                  |        | 0.4543 | 0.940 | 0.4171 | 0.954 | 0.2371 | 0.964 |
|                     |                  | 2      | 0.5745 | 0.931 | 0.5184 | 0.945 | 0.4626 | 0.955 |
|                     |                  |        | 0.5570 | 0.933 | 0.4626 | 0.948 | 0.4185 | 0.959 |
|                     |                  | 3      | 0.7056 | 0.924 | 0.5965 | 0.938 | 0.5626 | 0.945 |
|                     |                  |        | 0.6372 | 0.927 | 0.5422 | 0.942 | 0.5287 | 0.950 |
|                     | 80[80%]          | 1      | 0.4694 | 0.943 | 0.3318 | 0.960 | 0.2949 | 0.968 |
|                     |                  |        | 0.4408 | 0.946 | 0.4076 | 0.957 | 0.2148 | 0.973 |
|                     |                  | 2      | 0.4751 | 0.941 | 0.3877 | 0.955 | 0.3466 | 0.963 |
|                     |                  |        | 0.4989 | 0.939 | 0.4213 | 0.952 | 0.2510 | 0.967 |
|                     |                  | 3      | 0.5109 | 0.936 | 0.4839 | 0.949 | 0.3934 | 0.959 |
|                     |                  |        | 0.5554 | 0.932 | 0.5007 | 0.946 | 0.4399 | 0.962 |

Table S7: The ACLs (1st column) and CPs (2nd column) of asymptotic/credible intervals of  $R(t)$ .

| $T$                 | $n[\text{FP}\%]$ | Scheme  | ACI-LF |        | BCI-LF |        |        |        |       |
|---------------------|------------------|---------|--------|--------|--------|--------|--------|--------|-------|
|                     |                  |         | ACI-SF |        | BCI-SF |        |        |        |       |
| Prior $\rightarrow$ |                  |         |        |        | P1     |        | P2     |        |       |
| 2                   | 40[50%]          | 1       | 0.0805 | 0.948  | 0.0708 | 0.962  | 0.0699 | 0.967  |       |
|                     |                  |         | 0.0795 | 0.950  | 0.0690 | 0.964  | 0.0657 | 0.969  |       |
|                     |                  | 0.0872  | 0.947  | 0.0835 | 0.960  | 0.0713 | 0.964  |        |       |
|                     |                  | 0.0926  | 0.945  | 0.0883 | 0.957  | 0.0805 | 0.962  |        |       |
|                     |                  | 0.0514  | 0.961  | 0.0401 | 0.975  | 0.0376 | 0.980  |        |       |
|                     |                  | 0.0657  | 0.959  | 0.0503 | 0.973  | 0.0486 | 0.978  |        |       |
|                     | 0.0736           | 0.954   | 0.0594 | 0.968  | 0.0512 | 0.973  |        |        |       |
|                     | 0.0295           | 0.972   | 0.0278 | 0.983  | 0.0215 | 0.987  |        |        |       |
|                     | 0.0466           | 0.967   | 0.0366 | 0.980  | 0.0302 | 0.984  |        |        |       |
|                     | 0.0522           | 0.960   | 0.0371 | 0.974  | 0.0344 | 0.980  |        |        |       |
|                     | 0.0222           | 0.974   | 0.0206 | 0.985  | 0.0132 | 0.989  |        |        |       |
|                     | 0.0290           | 0.972   | 0.0215 | 0.987  | 0.0190 | 0.986  |        |        |       |
|                     | 0.0309           | 0.971   | 0.0241 | 0.985  | 0.0220 | 0.983  |        |        |       |
|                     | 5                | 40[50%] | 1      | 0.0619 | 0.957  | 0.0536 | 0.968  | 0.0453 | 0.973 |
|                     |                  |         |        | 0.0564 | 0.961  | 0.0291 | 0.974  | 0.0230 | 0.980 |
|                     |                  |         | 0.0690 | 0.956  | 0.0383 | 0.969  | 0.0261 | 0.978  |       |
|                     |                  |         | 0.0832 | 0.948  | 0.0789 | 0.961  | 0.0676 | 0.967  |       |
|                     |                  |         | 0.0473 | 0.964  | 0.0222 | 0.977  | 0.0132 | 0.987  |       |
|                     |                  |         | 0.0531 | 0.962  | 0.0274 | 0.975  | 0.0194 | 0.984  |       |
|                     |                  | 0.0644  | 0.958  | 0.0287 | 0.973  | 0.0217 | 0.982  |        |       |
|                     |                  | 0.0231  | 0.975  | 0.0160 | 0.989  | 0.0122 | 0.990  |        |       |
|                     |                  | 0.0258  | 0.974  | 0.0221 | 0.985  | 0.0145 | 0.988  |        |       |
|                     |                  | 0.0299  | 0.968  | 0.0225 | 0.982  | 0.0175 | 0.985  |        |       |
|                     |                  | 0.0135  | 0.983  | 0.0125 | 0.990  | 0.0110 | 0.991  |        |       |
| 0.0189              |                  | 0.978   | 0.0145 | 0.987  | 0.0130 | 0.989  |        |        |       |
| 0.0196              |                  | 0.975   | 0.0164 | 0.985  | 0.0149 | 0.988  |        |        |       |

Table S8: The ACLs (1st column) and CPs (2nd column) of asymptotic/credible intervals of  $h(t)$ .

| $T$                 | $n[\text{FP}\%]$ | Scheme | ACI-LF<br>ACI-SF |        | BCI-LF<br>BCI-SF |       |        |       |
|---------------------|------------------|--------|------------------|--------|------------------|-------|--------|-------|
| Prior $\rightarrow$ |                  |        |                  |        | P1               |       | P2     |       |
| 2                   | 40[50%]          | 1      | 0.2632           | 0.936  | 0.2592           | 0.947 | 0.2250 | 0.953 |
|                     |                  |        | 0.2498           | 0.939  | 0.2362           | 0.950 | 0.2115 | 0.956 |
|                     |                  | 2      | 0.2718           | 0.932  | 0.2613           | 0.943 | 0.2506 | 0.949 |
|                     |                  |        | 0.2645           | 0.934  | 0.2594           | 0.945 | 0.2193 | 0.952 |
|                     |                  | 3      | 0.2894           | 0.929  | 0.2797           | 0.940 | 0.2763 | 0.946 |
|                     |                  |        | 0.2880           | 0.930  | 0.2716           | 0.941 | 0.2592 | 0.947 |
|                     | 40[80%]          | 1      | 0.2139           | 0.945  | 0.2058           | 0.956 | 0.1939 | 0.962 |
|                     |                  |        | 0.2103           | 0.946  | 0.1989           | 0.957 | 0.1864 | 0.964 |
|                     |                  | 2      | 0.2381           | 0.941  | 0.2267           | 0.952 | 0.2107 | 0.958 |
|                     |                  |        | 0.2273           | 0.943  | 0.2198           | 0.954 | 0.1951 | 0.960 |
|                     |                  | 3      | 0.2562           | 0.938  | 0.2338           | 0.945 | 0.2314 | 0.951 |
|                     |                  |        | 0.2714           | 0.934  | 0.2283           | 0.949 | 0.2046 | 0.955 |
|                     | 80[50%]          | 1      | 0.1883           | 0.949  | 0.1627           | 0.960 | 0.1529 | 0.966 |
|                     |                  |        | 0.1754           | 0.951  | 0.1608           | 0.961 | 0.1267 | 0.968 |
|                     |                  | 2      | 0.1977           | 0.947  | 0.1854           | 0.958 | 0.1630 | 0.963 |
|                     |                  |        | 0.1862           | 0.949  | 0.1680           | 0.960 | 0.1333 | 0.966 |
|                     |                  | 3      | 0.2196           | 0.944  | 0.2016           | 0.954 | 0.1743 | 0.961 |
|                     |                  |        | 0.2311           | 0.941  | 0.1969           | 0.952 | 0.1747 | 0.961 |
|                     | 80[80%]          | 1      | 0.1608           | 0.956  | 0.1392           | 0.967 | 0.1147 | 0.973 |
|                     |                  |        | 0.1453           | 0.958  | 0.1302           | 0.968 | 0.1114 | 0.974 |
|                     |                  | 2      | 0.1789           | 0.951  | 0.1520           | 0.962 | 0.1308 | 0.968 |
|                     |                  |        | 0.1562           | 0.953  | 0.1344           | 0.964 | 0.1280 | 0.970 |
|                     |                  | 3      | 0.1994           | 0.948  | 0.1684           | 0.959 | 0.1471 | 0.967 |
|                     |                  |        | 0.1691           | 0.950  | 0.1583           | 0.961 | 0.1536 | 0.965 |
| 5                   | 40[50%]          | 1      | 0.2608           | 0.937  | 0.2296           | 0.952 | 0.2171 | 0.956 |
|                     |                  |        | 0.2474           | 0.941  | 0.1753           | 0.955 | 0.1314 | 0.960 |
|                     |                  | 2      | 0.2692           | 0.933  | 0.2591           | 0.946 | 0.2380 | 0.952 |
|                     |                  |        | 0.2615           | 0.935  | 0.1977           | 0.949 | 0.1564 | 0.955 |
|                     |                  | 3      | 0.2680           | 0.930  | 0.2714           | 0.944 | 0.2673 | 0.947 |
|                     |                  |        | 0.2990           | 0.928  | 0.2706           | 0.944 | 0.2519 | 0.949 |
|                     | 40[80%]          | 1      | 0.1728           | 0.951  | 0.1518           | 0.965 | 0.1319 | 0.970 |
|                     |                  |        | 0.1623           | 0.953  | 0.1453           | 0.967 | 0.1163 | 0.973 |
|                     |                  | 2      | 0.1914           | 0.947  | 0.1692           | 0.961 | 0.1510 | 0.966 |
|                     |                  |        | 0.1788           | 0.950  | 0.1601           | 0.962 | 0.1340 | 0.969 |
|                     |                  | 3      | 0.2447           | 0.941  | 0.2211           | 0.955 | 0.2154 | 0.960 |
|                     |                  |        | 0.2155           | 0.946  | 0.1657           | 0.960 | 0.1459 | 0.965 |
|                     | 80[50%]          | 1      | 0.1395           | 0.9590 | 0.1110           | 0.973 | 0.0906 | 0.978 |
|                     |                  |        | 0.1018           | 0.962  | 0.0969           | 0.976 | 0.0786 | 0.981 |
|                     |                  | 2      | 0.1520           | 0.957  | 0.1347           | 0.971 | 0.0927 | 0.979 |
|                     |                  |        | 0.1277           | 0.960  | 0.1117           | 0.973 | 0.1014 | 0.976 |
|                     |                  | 3      | 0.1632           | 0.952  | 0.1467           | 0.966 | 0.1107 | 0.971 |
|                     |                  |        | 0.1527           | 0.954  | 0.1403           | 0.967 | 0.1091 | 0.973 |
|                     | 80[80%]          | 1      | 0.1219           | 0.968  | 0.0958           | 0.980 | 0.0866 | 0.983 |
|                     |                  |        | 0.0831           | 0.966  | 0.0623           | 0.984 | 0.0571 | 0.987 |
|                     |                  | 2      | 0.1482           | 0.958  | 0.1130           | 0.972 | 0.0881 | 0.981 |
|                     |                  |        | 0.0928           | 0.964  | 0.0855           | 0.978 | 0.0706 | 0.984 |
|                     |                  | 3      | 0.1539           | 0.956  | 0.1309           | 0.970 | 0.0965 | 0.978 |
|                     |                  |        | 0.1098           | 0.961  | 0.1012           | 0.975 | 0.0867 | 0.980 |

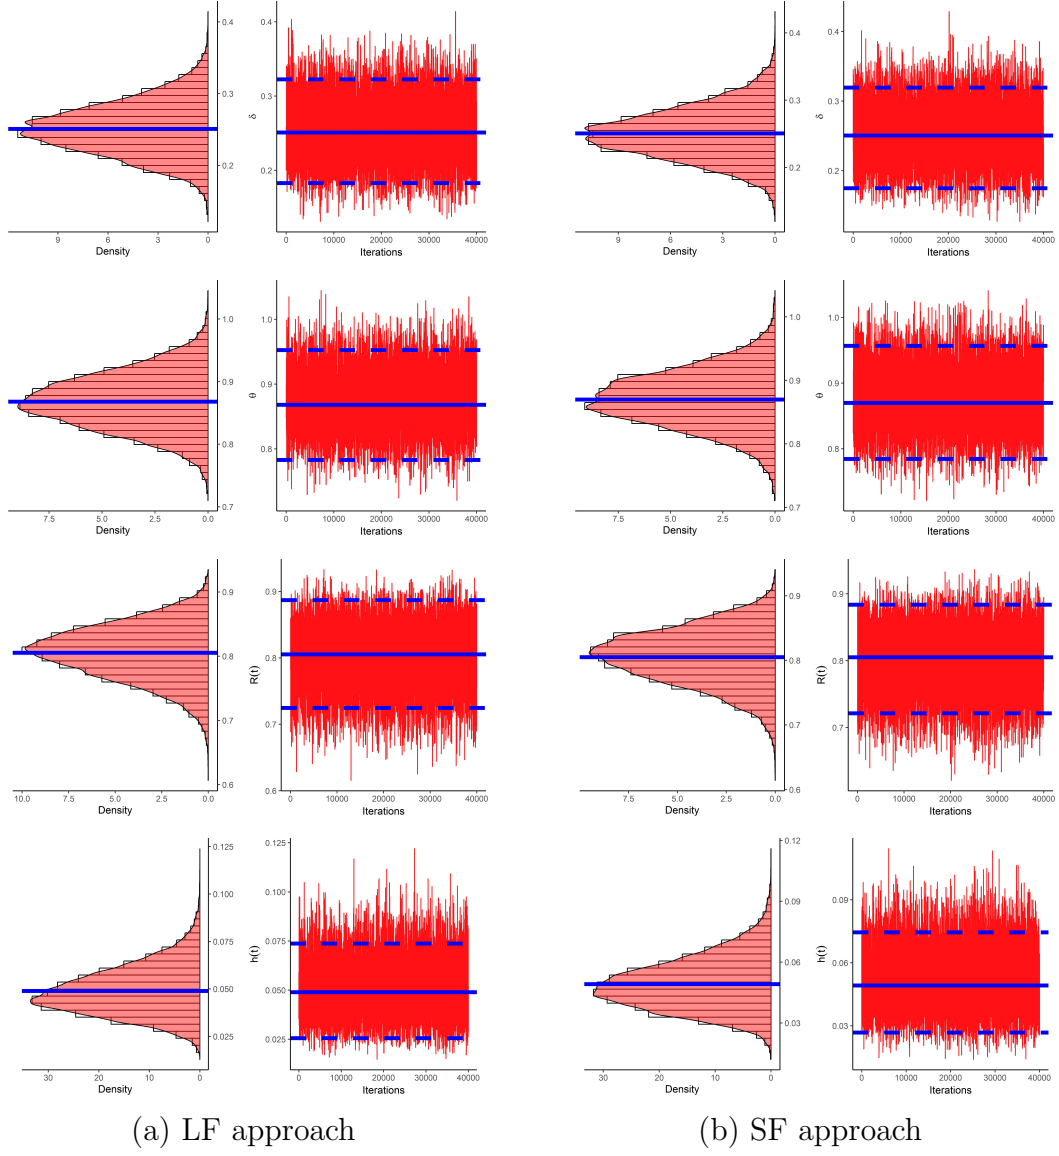

Figure S1: Histogram (left) and Trace (right) plots of  $\delta$ ,  $\theta$ ,  $R(t)$  and  $h(t)$  based on sample  $\mathcal{S}_2$  from electronic devices data.

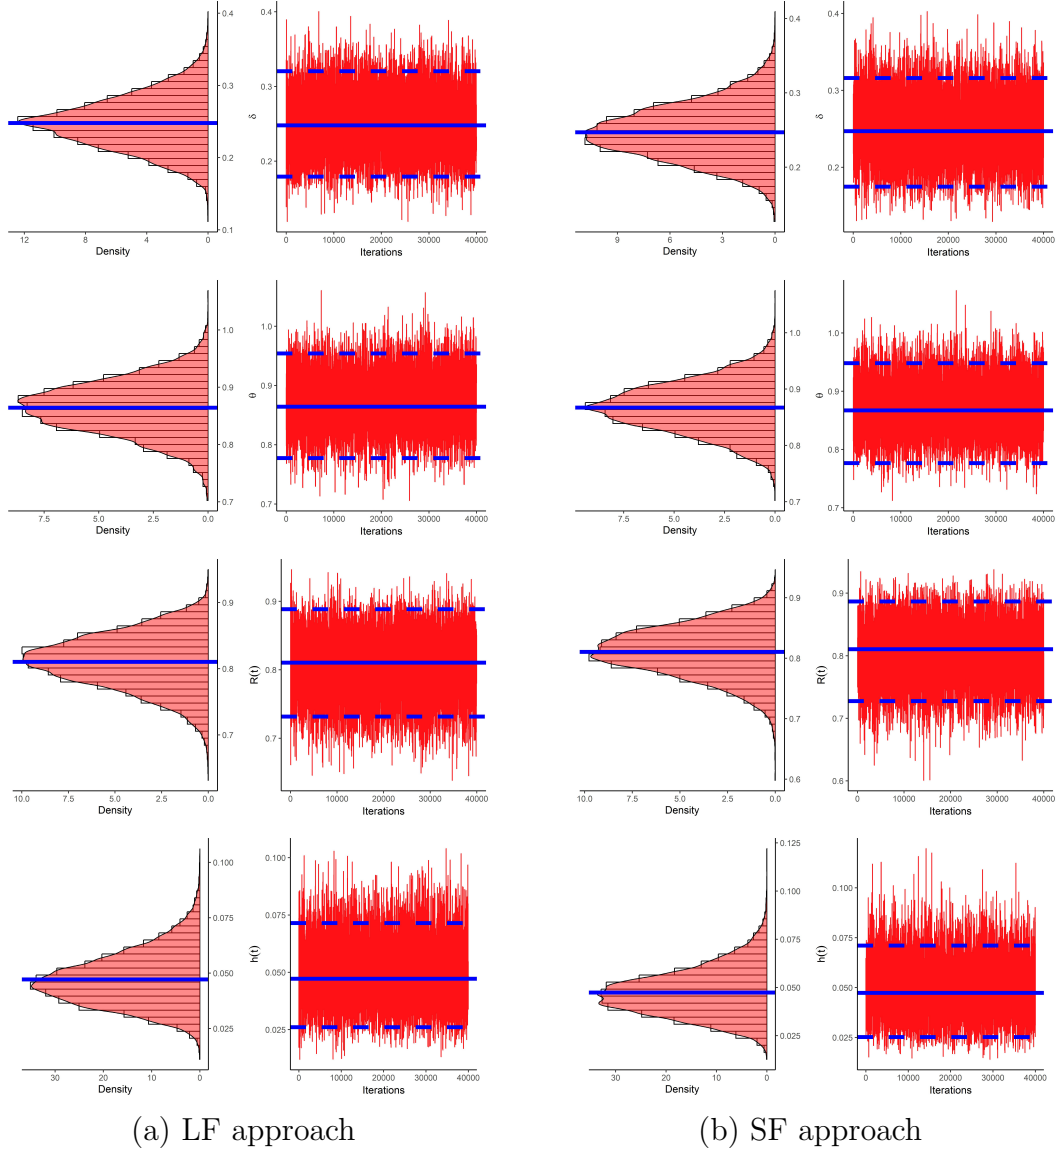

Figure S2: Histogram (left) and Trace (right) plots of  $\delta$ ,  $\theta$ ,  $R(t)$  and  $h(t)$  based on sample  $\mathcal{S}_3$  from electronic devices data.

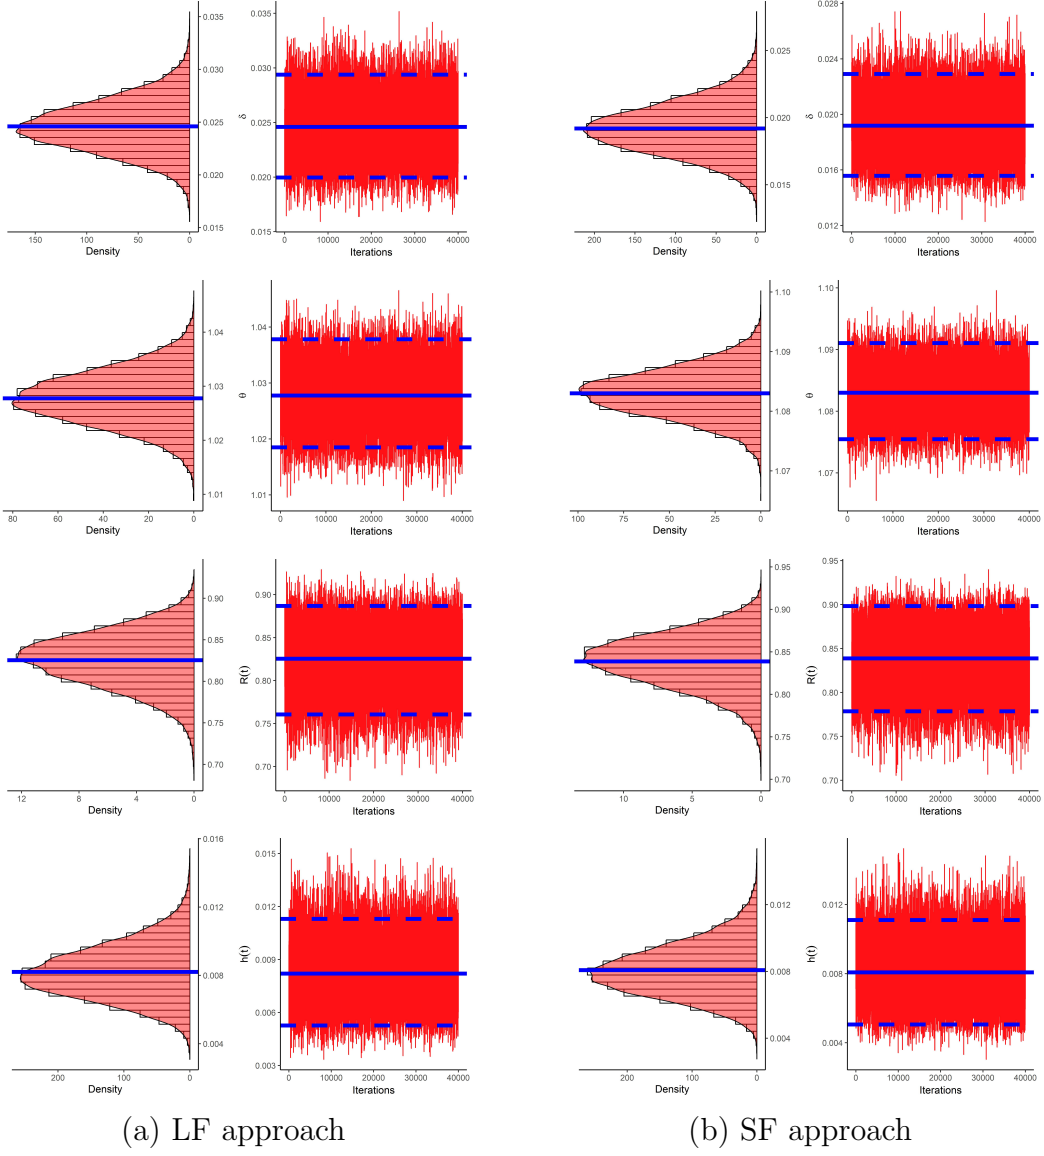

Figure S3: Histogram (left) and Trace (right) plots of  $\delta$ ,  $\theta$ ,  $R(t)$  and  $h(t)$  based on sample  $\mathcal{S}_2$  from CHN data.

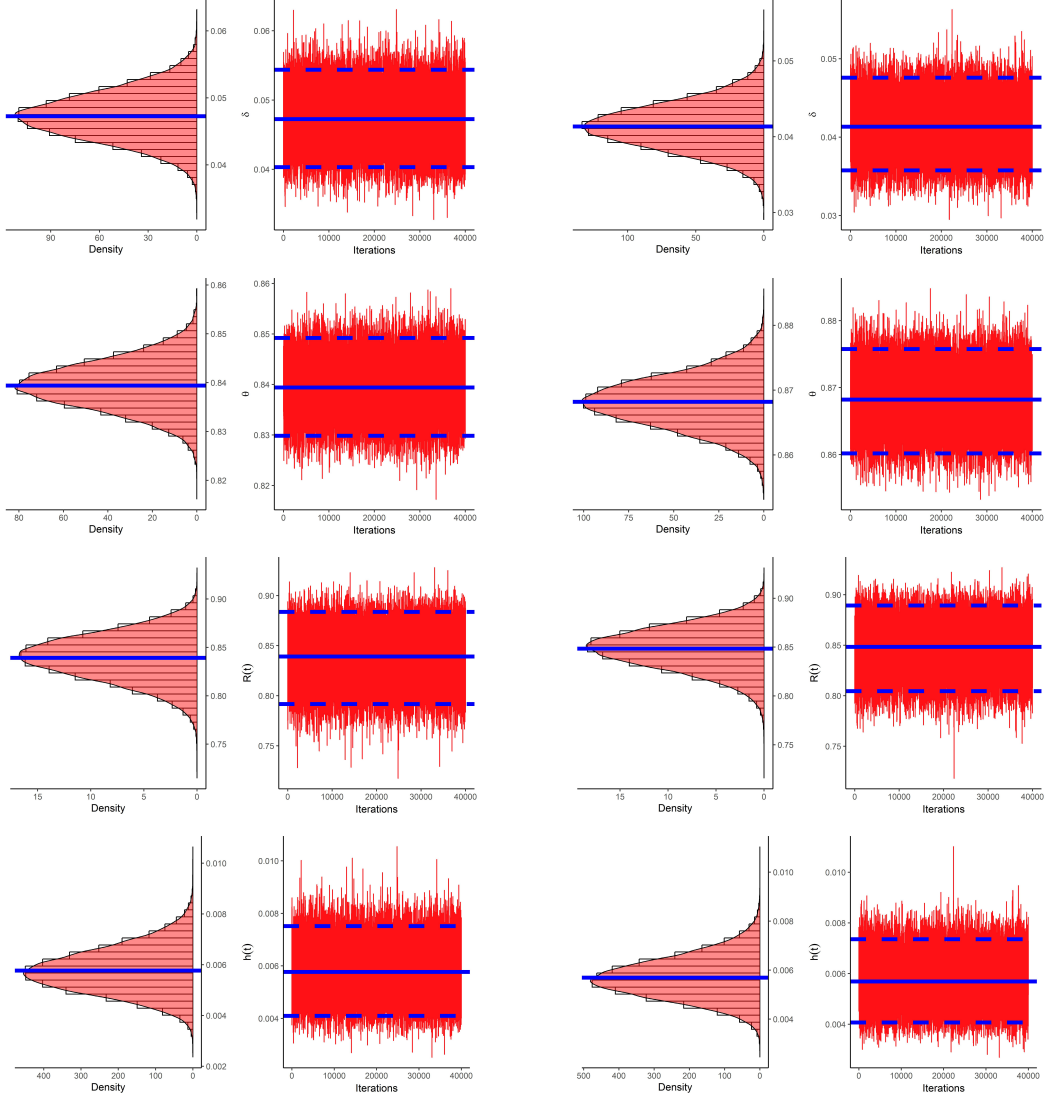

(a) LF approach

(b) SF approach

Figure S4: Histogram (left) and Trace (right) plots of  $\delta$ ,  $\theta$ ,  $R(t)$  and  $h(t)$  based on sample  $\mathcal{S}_3$  from CHN data.
